# Supplementary material for: Digital Information Technology Use and Patient Preferences for Internet-Based Health Education Modalities: Cross-Sectional Survey Study of Middle-Aged and Older Adults With Chronic Health Conditions
Source: PubMed Central journal article supplement (PMC6716442; doi:10.2196/12243), 2019-04-04
Supplement: aging_v2i1e12243_app1.pdf [file aging_v2i1e12243_app1.pdf]

MULTIMEDIA APPENDIX 1:

Logistic regression models predicting use of Web-based HIA<sup>a</sup> resources in past 12 months, ages 45 to 85 and age groups 45 to 65, 66 to 75, and 75 to 85 years

|                            | <u>All</u>                |                 | <u>Internet Users</u> |                 |
|----------------------------|---------------------------|-----------------|-----------------------|-----------------|
|                            | AOR (95% CI) <sup>a</sup> | <i>P</i> -value | AOR (95% CI)          | <i>P</i> -value |
| <b>Ages 45 to 85 years</b> |                           |                 |                       |                 |
| Sex                        |                           |                 |                       |                 |
| Male                       | (ref)                     |                 | (ref)                 |                 |
| Female                     | 1.24 (1.12-1.37)          | <.001           | 1.27 (1.14-1.41)      | <.001           |
| Age group                  |                           |                 |                       |                 |
| 45-65 yr                   | (ref)                     |                 | (ref)                 |                 |
| 66-75 yr                   | 0.91 (0.81-1.01)          | 0.08            | 1.07 (0.95-1.20)      | 0.29            |
| 76-85 yr                   | 0.59 (0.51-0.67)          | <.001           | 0.99 (0.85-1.16)      | 0.90            |
| Race/ethnicity             |                           |                 |                       |                 |
| White non-Hispanic         | (ref)                     |                 | (ref)                 |                 |
| Black                      | 0.76 (0.63-0.92)          | 0.004           | 0.86 (0.70-1.06)      | 0.16            |
| Hispanic                   | 0.64 (0.54-0.76)          | <.001           | 0.68 (0.57-0.82)      | <.001           |
| Filipino                   | 0.56 (0.36-0.88)          | 0.011           | 0.62 (0.39-0.98)      | 0.040           |
| East Asian                 | 0.64 (0.42-0.98)          | 0.041           | 0.64 (0.41-0.99)      | 0.045           |
| Other Asian                | 0.94 (0.63-1.38)          | 0.73            | 0.98 (0.65-1.46)      | 0.91            |
| Other race/ethnicity       | 0.88 (0.62-1.24)          | 0.46            | 0.94 (0.66-1.36)      | 0.77            |
| Education                  |                           |                 |                       |                 |
| College graduate           | (ref)                     |                 | (ref)                 |                 |
| Some college               | 0.82 (0.73-0.92)          | 0.001           | 0.90 (0.80-1.02)      | 0.11            |
| No college                 | 0.48 (0.42-0.55)          | <.001           | 0.66 (0.57-0.77)      | <.001           |
| <b>Ages 45 to 65 years</b> |                           |                 |                       |                 |
| Sex                        |                           |                 |                       |                 |
| Male                       | (ref)                     |                 | (ref)                 |                 |
| Female                     | 1.43 (1.24-1.64)          | <.001           | 1.42 (1.23-1.63)      | <.001           |
| Race/ethnicity             |                           |                 |                       |                 |
| White non-Hispanic         | (ref)                     |                 | (ref)                 |                 |
| Black                      | 0.79 (0.62-1.00)          | 0.05            | 0.87 (0.68-1.12)      | 0.29            |
| Hispanic                   | 0.64 (0.52-0.79)          | <.001           | 0.66 (0.54-0.82)      | <0.001          |
| Filipino                   | 0.56 (0.32-0.97)          | 0.037           | 0.57 (0.32-1.00)      | 0.05            |
| East Asian                 | 0.54 (0.32-0.91)          | 0.022           | 0.51 (0.30-0.88)      | 0.016           |
| Other Asian                | 1.05 (0.65-1.70)          | 0.83            | 1.11 (0.68-1.81)      | 0.68            |
| Other race/ethnicity       | 0.91 (0.58-1.43)          | 0.69            | 0.97 (0.61-1.55)      | 0.90            |
| Education                  |                           |                 |                       |                 |
| College graduate           | (ref)                     |                 | (ref)                 |                 |
| Some college               | 0.87 (0.75-1.02)          | 0.09            | 0.93 (0.80-1.10)      | 0.40            |
| No college                 | 0.57 (0.47-0.68)          | <.001           | 0.69 (0.57-0.83)      | <0.001          |

(contd.)

Logistic regression models predicting use of Web-based HIA<sup>a</sup> resources in past 12 months, ages 45 to 85 and age groups 45 to 65, 66 to 75, and 75 to 85 years (contd.)

|                            | <u>All</u>                |                 | <u>Internet Users</u> |                 |
|----------------------------|---------------------------|-----------------|-----------------------|-----------------|
|                            | AOR (95% CI) <sup>a</sup> | <i>P</i> -value | AOR (95% CI)          | <i>P</i> -value |
| <b>Ages 66 to 75 years</b> |                           |                 |                       |                 |
| Sex                        |                           |                 |                       |                 |
| Male                       | (ref)                     |                 | (ref)                 |                 |
| Female                     | 1.05 (0.88-1.25)          | 0.61            | 1.05 (0.87-1.26)      | 0.63            |
| Race/ethnicity             |                           |                 |                       |                 |
| White non-Hispanic         | (ref)                     |                 | (ref)                 |                 |
| Black                      | 0.71 (0.48-1.03)          | 0.61            | 0.89 (0.59-1.34)      | 0.576           |
| Hispanic                   | 0.74 (0.53-1.03)          | 0.07            | 0.83 (0.57-1.20)      | 0.32            |
| Filipino                   | 0.52 (0.24-1.12)          | 0.07            | 0.73 (0.33-1.62)      | 0.44            |
| East Asian                 | 1.15 (0.53-2.48)          | 0.09            | 1.34 (0.61-2.93)      | 0.46            |
| Other Asian                | 0.74 (0.37-1.47)          | 0.73            | 0.71 (0.36-1.40)      | 0.327           |
| Other race/ethnicity       | 0.71 (0.41-1.23)          |                 | 0.81 (0.44-1.48)      | 0.50            |
| Education                  |                           |                 |                       |                 |
| College graduate           | (ref)                     | 0.39            | (ref)                 |                 |
| Some college               | 0.78 (0.64-0.95)          | 0.22            | 0.91 (0.74-1.12)      | 0.37            |
| No college                 | 0.35 (0.27-0.44)          | <.001           | 0.52 (0.40-0.68)      | <.001           |
| <b>Ages 76 to 85 years</b> |                           |                 |                       |                 |
| Sex                        |                           |                 |                       |                 |
| Male                       | (ref)                     |                 | (ref)                 |                 |
| Female                     | 0.80 (0.62-1.01)          | 0.062           | 0.89 (0.68-1.16)      | 0.39            |
| Race/ethnicity             |                           |                 |                       |                 |
| White non-Hispanic         | (ref)                     |                 | (ref)                 |                 |
| Black                      | 0.63 (0.36-1.07)          | 0.09            | 0.67 (0.37-1.20)      | 0.17            |
| Hispanic                   | 0.43 (0.29-0.65)          | <.001           | 0.57 (0.36-0.89)      | 0.014           |
| Filipino                   | 0.82 (0.26-2.65)          | 0.74            | 0.97 (0.27-3.49)      | 0.96            |
| East Asian                 | 1.05 (0.34-3.26)          | 0.94            | 1.22 (0.36-4.15)      | 0.75            |
| Other Asian                | 0.52 (0.19-1.46)          | 0.21            | 0.53 (0.18-1.60)      | 0.26            |
| Other race/ethnicity       | 0.97 (0.44-2.15)          | 0.94            | 1.04 (0.41-2.60)      | 0.94            |
| Education                  |                           |                 |                       |                 |
| College graduate           | (ref)                     |                 | (ref)                 |                 |
| Some college               | 0.60 (0.45-0.80)          | 0.015           | 0.72 (0.52-0.98)      | 0.038           |
| No college                 | 0.36 (0.26-0.48)          | <.001           | 0.86 (0.61-1.21)      | 0.38            |

<sup>a</sup>HIA: health information and advice; AOR: adjusted odds ratio; CI: confidence interval
