# Supplementary material for: Digital Information Technology Use and Patient Preferences for Internet-Based Health Education Modalities: Cross-Sectional Survey Study of Middle-Aged and Older Adults With Chronic Health Conditions
Source: PubMed Central journal article supplement (PMC6716442; doi:10.2196/12243), 2019-04-04
Supplement: aging_v2i1e12243_app2.pdf [file aging_v2i1e12243_app2.pdf]

MULTIMEDIA APPENDIX 2:

Table 5. Preferred methods of obtaining health information and advice, adults aged 45 to 65 years, by level of education<sup>a</sup>

| HIA modality                                     | College graduate<br>(N=1,574) |           | Some college<br>(N=1,311) |           | No college<br>(N=772) |            |
|--------------------------------------------------|-------------------------------|-----------|---------------------------|-----------|-----------------------|------------|
|                                                  | %                             | 95% CI    | %                         | 95% CI    | %                     | 95% CI     |
| Any internet-based HIA modality                  | 85.4                          | 83.4-87.4 | 78.0 <sup>b</sup>         | 75.6-80.4 | 69.2 <sup>b,c</sup>   | 65.6-72.7  |
| Internet users <sup>d</sup>                      | 85.7                          | 83.7-87.7 | 79.9 <sup>b</sup>         | 77.4-82.3 | 74.3 <sup>b,e</sup>   | 70.6-77.9  |
| HIA from a webpage                               | 55.5                          | 52.7-58.2 | 50.2 <sup>f</sup>         | 47.2-53.1 | 40.7 <sup>b,c</sup>   | 36.8-44.6  |
| Internet users <sup>d</sup>                      | 55.7                          | 53.0-58.5 | 51.8                      | 48.8-54.9 | 44.2 <sup>b,g</sup>   | 40.1-48.4  |
| Web-based video                                  | 28.7                          | 26.2-31.2 | 22.9 <sup>b</sup>         | 20.3-25.4 | 17.1 <sup>b,i</sup>   | 14.1-20.0  |
| Web-based interactive program <sup>h</sup>       | 15.9                          | 13.9-18.0 | 11.1 <sup>b</sup>         | 9.2-12.9  | 5.9 <sup>b,j</sup>    | 4.0-7.8    |
| Video visit with a patient educator <sup>h</sup> | 10.8                          | 9.2-12.5  | 6.9 <sup>b</sup>          | 5.4-8.5   | 3.6 <sup>b,l</sup>    | 2.1-5.0    |
| Message sent through the patient portal          | 40.9                          | 38.2-43.6 | 38.6                      | 35.7-41.5 | 31.5 <sup>b,g</sup>   | 27.8-35.2  |
| Internet users <sup>d</sup>                      | 41.1                          | 38.4-43.9 | 39.9                      | 36.9-42.8 | 34.6 <sup>f</sup>     | 30.6-38.6  |
| Emailed newsletter                               | 42.0                          | 39.3-44.8 | 35.4 <sup>o</sup>         | 32.5-38.2 | 30.9 <sup>b</sup>     | 27.3-34.6  |
| Email users                                      | 42.4                          | 39.6-45.1 | 36.6 <sup>e</sup>         | 33.6-39.5 | 34.2 <sup>p</sup>     | 30.1-38.2  |
| Podcast/audio download <sup>h</sup>              | 10.4                          | 8.7-12.0  | 5.9 <sup>b</sup>          | 4.6-7.3   | 3.3 <sup>b</sup>      | 2.0-4.7    |
| Webinar or Web-based talk <sup>h</sup>           | 12.4                          | 10.5-14.2 | 9.3 <sup>q</sup>          | 7.6-11.0  | 4.5 <sup>b,c</sup>    | 2.8-6.1    |
| Chat room/online health community <sup>h</sup>   | 3.5                           | 2.5-4.5   | 3.5                       | 2.4-4.5   | 2.7                   | 1.3-4.1    |
| Health app                                       | 26.5                          | 24.1-29.0 | 22.4                      | 19.9-24.9 | 14.2 <sup>b,c</sup>   | 11.5-17.0  |
| If has a smartphone                              | 32.6                          | 29.6-35.6 | 29.2                      | 25.9-32.5 | 21.4 <sup>b,r</sup>   | 17.1-25.7  |
| Any non-internet HIA modality                    | 69.2                          | 66.6-71.8 | 72.1                      | 69.5-74.8 | 72.4                  | 68.9-75.9  |
| Print materials                                  | 32.0                          | 29.4-34.6 | 35.7                      | 32.9-38.6 | 31.0                  | 27.4-34.6  |
| In-person workshop or multi-session class        | 29.4                          | 26.9-31.9 | 24.5 <sup>b</sup>         | 22.0-27.0 | 20.5 <sup>b</sup>     | 17.2-23.8  |
| Counseling/coaching over the phone               | 17.3                          | 15.2-19.3 | 15.5                      | 13.4-17.7 | 15.5                  | 12.7-18.3  |
| In-person individual counseling                  | 33.8                          | 31.2-36.5 | 32.1                      | 29.3-34.9 | 28.1 <sup>b,k</sup>   | 24.6- 31.6 |
| Mailed newsletter                                | 18.9                          | 16.9-21.0 | 27.0 <sup>b</sup>         | 24.4-29.6 | 31.1 <sup>b</sup>     | 27.5-34.7  |
| Text message <sup>m</sup>                        | 16.6                          | 13.7-19.4 | 21.4                      | 17.9-24.9 | 18.9                  | 14.7-23.1  |
| Mobile phone users                               | 17.0                          | 14.0-19.9 | 21.9                      | 18.3-25.4 | 19.3                  | 15.0-23.5  |

N: unweighted count; %: percentage of age group with this characteristic based on weighted survey data;

CI: confidence interval; HIA: health information or advice; internet-based HIA modalities: information from a webpage, Web-based videos, Web-based interactive programs, video visit, patient portal messages, podcasts, webinars/Web-based talks, and chat rooms; non-internet HIA modalities: print materials, classes/workshops, in-person or phone counseling, mailed newsletters, and text messages.

<sup>a</sup> Prevalence of interest in using an HIA modality is estimated from weighted data for the 86% of the sample that indicated interest in using any HIA modality in the survey checklist.

<sup>b</sup> Significantly ( $P < .001$ ) lower than college graduates after controlling for sex and race/ethnicity.

<sup>c</sup> Significantly ( $P < .001$ ) lower than adults with some college after controlling for sex and race/ethnicity.

<sup>d</sup> Internet users are those who use the internet on their own or with help. Ns for internet users: no college: 683; some college: 1,259; college graduates: 1,563.

<sup>e</sup> Significantly ( $P < .02$ ) lower than adults with some college after controlling for sex and race/ethnicity.

<sup>f</sup> Significantly ( $P < .001$ ) lower than college graduates after controlling for sex and race/ethnicity.

<sup>g</sup> Significantly ( $P < .001$ ) lower than adults with some college after controlling for sex and race/ethnicity.

<sup>h</sup> Prevalence of interest among internet users is not reported but differs from prevalence for all adults in this age group by < 2 percentage points.

<sup>i</sup> Significantly ( $P = .002$ ) lower than adults with some college after controlling for sex and race/ethnicity.

<sup>j</sup> Significantly ( $P = .016$ ) lower than adults with some college after controlling for sex and race/ethnicity.

<sup>k</sup> Significantly ( $P < .04$ ) lower than adults with some college after controlling for sex and race/ethnicity.

<sup>l</sup> Significantly ( $P = .003$ ) lower than adults with some college after controlling for sex and race/ethnicity.

<sup>m</sup> Only asked about in the 2015 survey questionnaire. Subgroup Ns approximately half as large as above.

<sup>n</sup> Significantly ( $P = .011$ ) lower than college graduates after controlling for sex and race/ethnicity.

<sup>o</sup> Significantly ( $P = .003$ ) lower than college graduates after controlling for sex and race/ethnicity.

<sup>p</sup> Significantly ( $P = .004$ ) lower than college graduates after controlling for sex and race/ethnicity.

<sup>q</sup> Significantly ( $P = .006$ ) lower than college graduates after controlling for sex and race/ethnicity.

<sup>r</sup> Significantly ( $P = .007$ ) lower than adults with some college after controlling for sex and race/ethnicity.

MULTIMEDIA APPENDIX 2 (contd).

Table 6. Preferred methods of obtaining health information and advice, adults aged 66 to 75 years, by level of education<sup>a</sup>

| HIA modality                                     | College graduate<br>(N=928) |            | Some college<br>(N= 778) |           | No college<br>(N=475) |           |
|--------------------------------------------------|-----------------------------|------------|--------------------------|-----------|-----------------------|-----------|
|                                                  | %                           | 95% CI     | %                        | 95% CI    | %                     | 95% CI    |
| Any internet-based HIA modality                  | 81.2                        | 78.5-83.9  | 71.3 <sup>b</sup>        | 67.7-74.9 | 54.7 <sup>b,c</sup>   | 49.6-59.8 |
| Internet users <sup>d</sup>                      | 83.2                        | 80.6-85.9  | 77.6 <sup>b</sup>        | 74.1-81.1 | 67.3 <sup>b,c</sup>   | 61.8-72.8 |
| HIA from a webpage                               | 57.9                        | 54.4-61.4  | 47.9 <sup>b</sup>        | 43.9-51.8 | 31.4 <sup>b,c</sup>   | 26.7-36.2 |
| Internet users <sup>d</sup>                      | 59.5                        | 56.0-63.1  | 52.0 <sup>e</sup>        | 47.8-56.1 | 39.8 <sup>b,f</sup>   | 34.1-45.5 |
| Web-based video <sup>g</sup>                     | 19.3                        | 16.4-22.1  | 13.3 <sup>h</sup>        | 10.6-16.0 | 10.2 <sup>b,c</sup>   | 7.1-13.3  |
| Web-based interactive program <sup>g</sup>       | 10.1                        | 7.9-12.3   | 6.3 <sup>i</sup>         | 4.4-8.3   | 2.7 <sup>b,c</sup>    | 0.9-4.4   |
| Video visit with a patient educator <sup>g</sup> | 6.6                         | 4.8-8.3    | 3.9 <sup>j</sup>         | 2.4-5.4   | 1.3 <sup>b,f</sup>    | 0.1-2.5   |
| Message sent through the patient portal          | 43.6                        | 40.1-47.2  | 38.8                     | 35.0-42.7 | 26.4 <sup>b,c</sup>   | 21.8-31.0 |
| Internet users <sup>d</sup>                      | 45.0                        | 41.4-48.6  | 42.6                     | 38.5-46.7 | 33.5 <sup>l,f</sup>   | 27.8-39.1 |
| Emailed newsletter                               | 46.0                        | 42.4- 49.5 | 36.1 <sup>b</sup>        | 32.3-39.9 | 27.1 <sup>b,c</sup>   | 22.5-31.7 |
| Email users                                      | 47.2                        | 43.5-50.8  | 40.3 <sup>l</sup>        | 36.2-44.5 | 34.3 <sup>b</sup>     | 28.5-40.1 |
| Podcast/audio download <sup>g</sup>              | 5.8                         | 4.1-7.6    | 4.3                      | 2.7-5.9   | 1.6 <sup>n</sup>      | 0.3-2.9   |
| Webinar or Web-based talk <sup>g</sup>           | 8.4                         | 6.5-10.4   | 5.0 <sup>e</sup>         | 3.2-6.9   | 2.9 <sup>b</sup>      | 1.2-4.5   |
| Chat room/online health community <sup>g</sup>   | 1.4                         | 0.7-2.2    | 0.9                      | 0.2-1.5   | 0.8                   | <0.1-1.7  |
| Health app                                       | 13.3                        | 10.9-15.7  | 11.2                     | 8.7-13.8  | 4.6 <sup>b,c</sup>    | 2.6-6.7   |
| If has a smartphone                              | 20.8                        | 16.9-24.7  | 22.1                     | 17.0-27.1 | 12.5 <sup>o,p</sup>   | 6.1-19.0  |
| Any non-internet HIA modality                    | 76.4                        | 73.5-79.4  | 75.6                     | 72.2-79.0 | 78.5                  | 74.3-82.8 |
| Print materials                                  | 41.0                        | 37.5-44.5  | 39.0                     | 35.1-42.8 | 34.8                  | 29.9-39.6 |
| In-person workshop or multi-session class        | 31.3                        | 28.1-34.6  | 24.4 <sup>b,c</sup>      | 20.9-27.8 | 13.5 <sup>b,c</sup>   | 10.2-16.9 |
| Counseling/coaching over the phone               | 17.0                        | 14.3-19.6  | 15.8                     | 12.9-18.6 | 20.3                  | 16.2-24.3 |
| In-person individual counseling                  | 32.7                        | 29.4-36.0  | 29.2                     | 25.6-32.7 | 25.9 <sup>j</sup>     | 21.4-30.4 |
| Mailed newsletter                                | 32.4                        | 29.1-35.7  | 35.1                     | 31.3-38.8 | 44.4 <sup>b,m</sup>   | 39.4-49.4 |
| Text message <sup>k</sup>                        | 17.7                        | 13.7-21.7  | 13.3                     | 9.4-17.1  | 13.8                  | 8.8-18.8  |
| Mobile phone users                               | 18.2                        | 14.0-22.4  | 14.1                     | 10.0-18.2 | 15.0                  | 9.7-20.4  |

N: unweighted count; %: percentage of age group with this characteristic based on weighted survey data;

CI: confidence interval; HIA: health information or advice; internet-based HIA modalities: information from a webpage, Web-based videos, Web-based interactive programs, video visit, patient portal messages, podcasts, webinars/Web-based talks, and chat rooms; non-internet HIA modalities: print materials, classes/workshops, in-person or phone counseling, mailed newsletters, and text messages.

<sup>a</sup>Prevalence of interest in using an HIA modality is estimated from weighted data for the 86% of the sample that indicated interest in using any HIA modality in the survey checklist.

<sup>b</sup>Significantly ( $P < .001$ ) lower than college graduates after controlling for sex and race/ethnicity.

<sup>c</sup> Significantly ( $P < .001$ ) lower than adults with some college after controlling for sex and race/ethnicity.

<sup>d</sup> Internet users are those who use the internet alone or with help. Ns for internet users: no college: 346; some college:699; college graduate: 895.

<sup>e</sup> Significantly ( $P < .007$ ) lower than adults with some college after controlling for sex and race/ethnicity.

<sup>f</sup> Significantly ( $P < .03$ ) lower than adults with some college after controlling for sex and race/ethnicity.

<sup>g</sup> Prevalence of interest among internet users is not reported but differs from prevalence for all adults in this age group by < 2 percentage points.

<sup>h</sup> Significantly ( $P = .001$ ) lower than college graduates after controlling for sex and race/ethnicity.

<sup>i</sup> Significantly ( $P = .002$ ) lower than college graduates after controlling for sex and race/ethnicity.

<sup>j</sup> Significantly ( $P = .01$ ) lower than college graduates after controlling for sex and race/ethnicity.

<sup>k</sup> Only asked about in the 2015 survey questionnaire. Subgroup Ns are approximately half as large as above.

<sup>l</sup> Significantly ( $P < .02$ ) lower than college graduates after controlling for sex and race/ethnicity.

<sup>m</sup> Significantly ( $P = .009$ ) lower than adults with some college after controlling for sex and race/ethnicity.

<sup>n</sup> Significantly ( $P < .002$ ) lower than college graduates after controlling for sex and race/ethnicity.

<sup>o</sup> Significantly ( $P < .001$ ) lower than college graduates after controlling for sex and race/ethnicity.

<sup>p</sup> Significantly ( $P = .038$ ) lower than adults with some college after controlling for sex and race/ethnicity.

MULTIMEDIA APPENDIX 2 (contd):

Table 7. Preferred methods of obtaining health information and advice, adults aged 76 to 85 years, by level of education<sup>a</sup>

| HIA modality                                     | College graduate<br>(N=620) |           | Some college<br>(N=533) |           | No college<br>(N=540) |           |
|--------------------------------------------------|-----------------------------|-----------|-------------------------|-----------|-----------------------|-----------|
|                                                  | %                           | 95% CI    | %                       | 95% CI    | %                     | 95% CI    |
| Any internet-based HIA modality                  | 65.1                        | 60.0-70.2 | 59.5                    | 54.0-65.0 | 42.4 <sup>b,c</sup>   | 36.7-48.1 |
| Internet users <sup>d</sup>                      | 72.1                        | 67.1-77.2 | 71.5                    | 66.0-77.0 | 64.6                  | 57.8-71.5 |
| HIA from a webpage                               | 42.9                        | 37.7-48.1 | 37.1                    | 31.6-42.5 | 25.8 <sup>b,c</sup>   | 20.9-30.7 |
| Internet users <sup>d</sup>                      | 47.7                        | 42.2-53.2 | 45.4                    | 39.2-51.6 | 45.7                  | 38.4-53.1 |
| Web-based video <sup>g</sup>                     | 11.4                        | 8.5-14.3  | 6.9 <sup>e</sup>        | 4.6-9.2   | 3.1 <sup>b,f</sup>    | 1.3-4.8   |
| Web-based interactive program <sup>g</sup>       | 5.8                         | 3.6-8.1   | 2.3 <sup>h</sup>        | 0.7-3.9   | 0.5 <sup>b,i</sup>    | <0.1-1.0  |
| Video visit with a patient educator <sup>g</sup> | 3.7                         | 1.9-5.5   | 2.2                     | 0.7-3.6   | 2.1                   | 0.2-3.9   |
| Message sent through the patient portal          | 30.8                        | 26.1-35.4 | 24.6                    | 19.9-29.4 | 16.5 <sup>b,l</sup>   | 12.0-21.0 |
| Internet users                                   | 34.1                        | 29.1-39.2 | 31.3                    | 25.6-37.1 | 28.3                  | 21.5-35.1 |
| Emailed newsletter                               | 33.7                        | 28.7-38.6 | 28.0                    | 23.1-33.0 | 20.6 <sup>o</sup>     | 15.8-25.3 |
| Email users                                      | 38.2                        | 32.7-43.6 | 34.0                    | 28.0-40.1 | 29.0                  | 22.3-35.8 |
| Podcast/audio download <sup>g</sup>              | 4.9                         | 2.3-7.4   | 1.5 <sup>p</sup>        | 0.4-2.6   | 1.3 <sup>b</sup>      | 0.2-2.5   |
| Webinar or Web-based talk <sup>g</sup>           | 4.9                         | 2.5-7.2   | 2.3                     | 0.7-4.0   | 1.0 <sup>e</sup>      | <0.1-2.4  |
| Chat room/online health community <sup>g</sup>   | 1.8                         | 0.3-3.2   | 0.6                     | 0.0-1.2   | 0.4                   | <0.1-1.1  |
| Health app                                       | 5.6                         | 3.6-7.5   | 4.2                     | 2.1-6.3   | 3.1                   | 1.2-5.0   |
| If has a smartphone                              | 14.6                        | 8.7-20.5  | 12.5                    | 4.2-20.8  | 18.1                  | 4.5-31.7  |
| Any non-internet HIA modality                    | 82.4                        | 78.8-86.0 | 80.4                    | 76.1-84.7 | 84.0                  | 79.6-88.5 |
| Print materials                                  | 46.4                        | 41.2-51.7 | 40.7                    | 35.1-46.2 | 39.4 <sup>e</sup>     | 33.9-45.0 |
| In-person workshop or multi-session class        | 29.3                        | 24.4-34.1 | 20.5 <sup>i</sup>       | 16.3-24.6 | 14.0 <sup>b,f</sup>   | 10.0-17.9 |
| Counseling/coaching over the phone               | 21.0                        | 16.5-25.4 | 14.0 <sup>k</sup>       | 10.4-17.6 | 18.7                  | 14.2-23.2 |
| In-person individual counseling                  | 35.1                        | 30.1-40.1 | 26.7 <sup>h</sup>       | 21.8-31.5 | 26.0 <sup>h</sup>     | 21.0-31.0 |
| Mailed newsletter                                | 44.0                        | 38.7-49.2 | 49.4                    | 43.8-55.0 | 52.2                  | 46.5-57.9 |
| Text message <sup>m</sup>                        | 13.3                        | 8.8-17.8  | 7.4                     | 3.8-10.9  | 5.7                   | 2.6-8.8   |
| Mobile phone users                               | 14.8                        | 9.8-19.8  | 8.6                     | 4.4-12.7  | 7.5                   | 3.4-11.6  |

N: unweighted count; %: percentage of age group with this characteristic based on weighted survey data; CI: confidence interval; HIA: health information or advice; internet-based HIA modalities: information from a webpage, Web-based videos, Web-based interactive programs, video visit, patient portal messages, podcasts, webinars/Web-based talks, and chat rooms; non-internet HIA modalities: print materials, classes/workshops, in-person or phone counseling, mailed newsletters, and text messages.

<sup>a</sup> Prevalence of interest in using an HIA modality is estimated from weighted data for the 86% of the sample that indicated interest in using any HIA modality in the survey checklist.

<sup>b</sup> Significantly ( $P < .001$ ) lower than college graduates after controlling for sex and race/ethnicity.

<sup>c</sup> Significantly ( $P < .001$ ) lower than adults with some college after controlling for sex and race/ethnicity.

<sup>d</sup> Internet users are those who use the internet alone or with help. Ns for internet users: no college: 314; some college: 429; college graduate: 557.

<sup>e</sup> Significantly ( $P < .04$ ) lower than college graduates after controlling for sex and race/ethnicity.

<sup>f</sup> Significantly ( $P < .03$ ) lower than adults with some college after controlling for sex and race/ethnicity.

<sup>g</sup> Prevalence of interest among internet users is not reported but differs from prevalence for all adults in this age group by < 5 percentage points.

<sup>h</sup> Significantly ( $P < .03$ ) lower than college graduates after controlling for sex and race/ethnicity.

<sup>i</sup> Significantly ( $P < .017$ ) lower than adults with some college after controlling for sex and race/ethnicity.

<sup>j</sup> Significantly ( $P = .001$ ) lower than college graduates after controlling for sex and race/ethnicity.

<sup>k</sup> Significantly ( $P = .0073$ ) lower than college graduates after controlling for sex and race/ethnicity.

<sup>l</sup> Significantly ( $P = .04$ ) lower than adults with some college after controlling for sex and race/ethnicity.

<sup>m</sup> Only asked about in the 2015 survey questionnaire. Subgroup Ns are approximately half as large as above.

<sup>n</sup> Significantly ( $P = .04$ ) lower than college graduates after controlling for sex and race/ethnicity.

<sup>o</sup> Significantly ( $P = .002$ ) lower than college graduates after controlling for sex and race/ethnicity.

<sup>p</sup> Significantly ( $P = .004$ ) lower than college graduates after controlling for sex and race/ethnicity.
